# Supplementary material for: Multi-fold increase in rainforests tipping risk beyond 1.5–2 °C warming
Source: Copernicus journal article supplement (doi:10.5194/egusphere-2023-1486), 2023-08-09

# Description of Supplementary data

Supplementary data shows forest transitions under different SSP scenarios for all ESMs, based on comparison between empirical (2001-2012) and CMIP6-SSP (2086-2100) derived forest classes. Detailed description provided in Methods and Figure 1. Color scheme of the spatial plots are based on the legend show below.

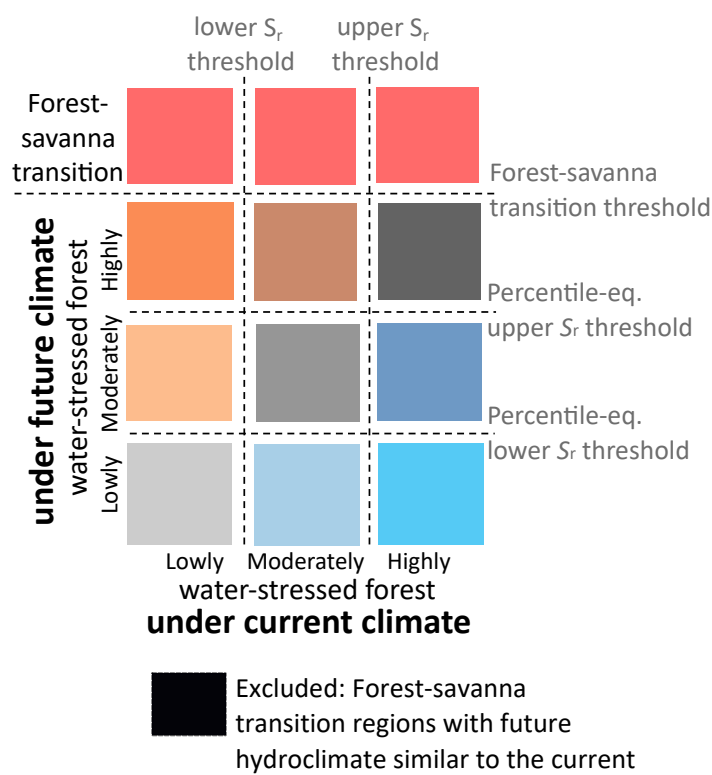

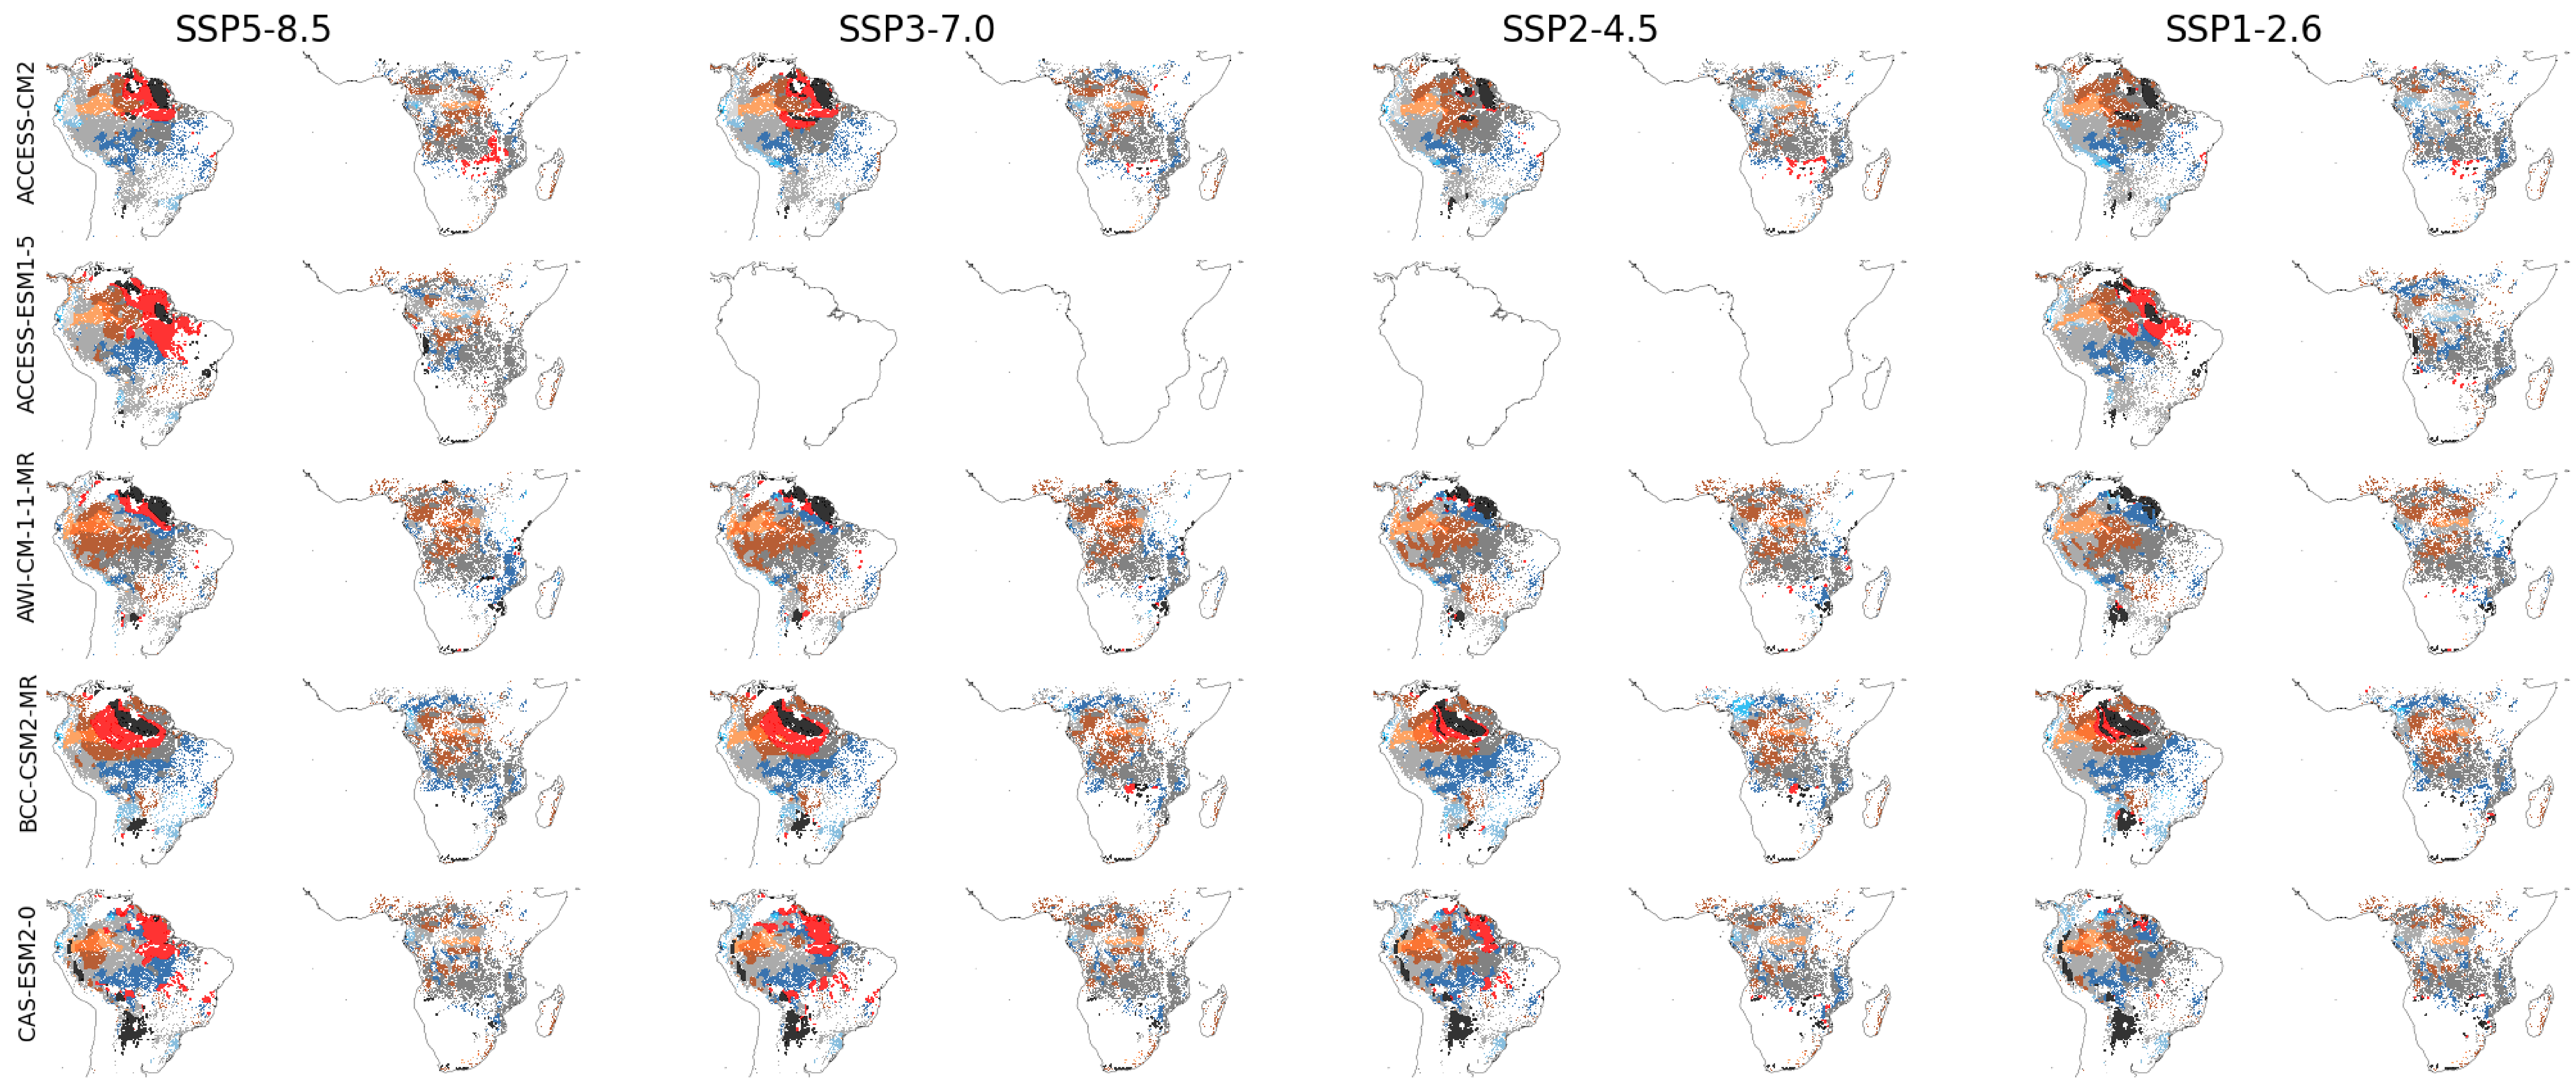

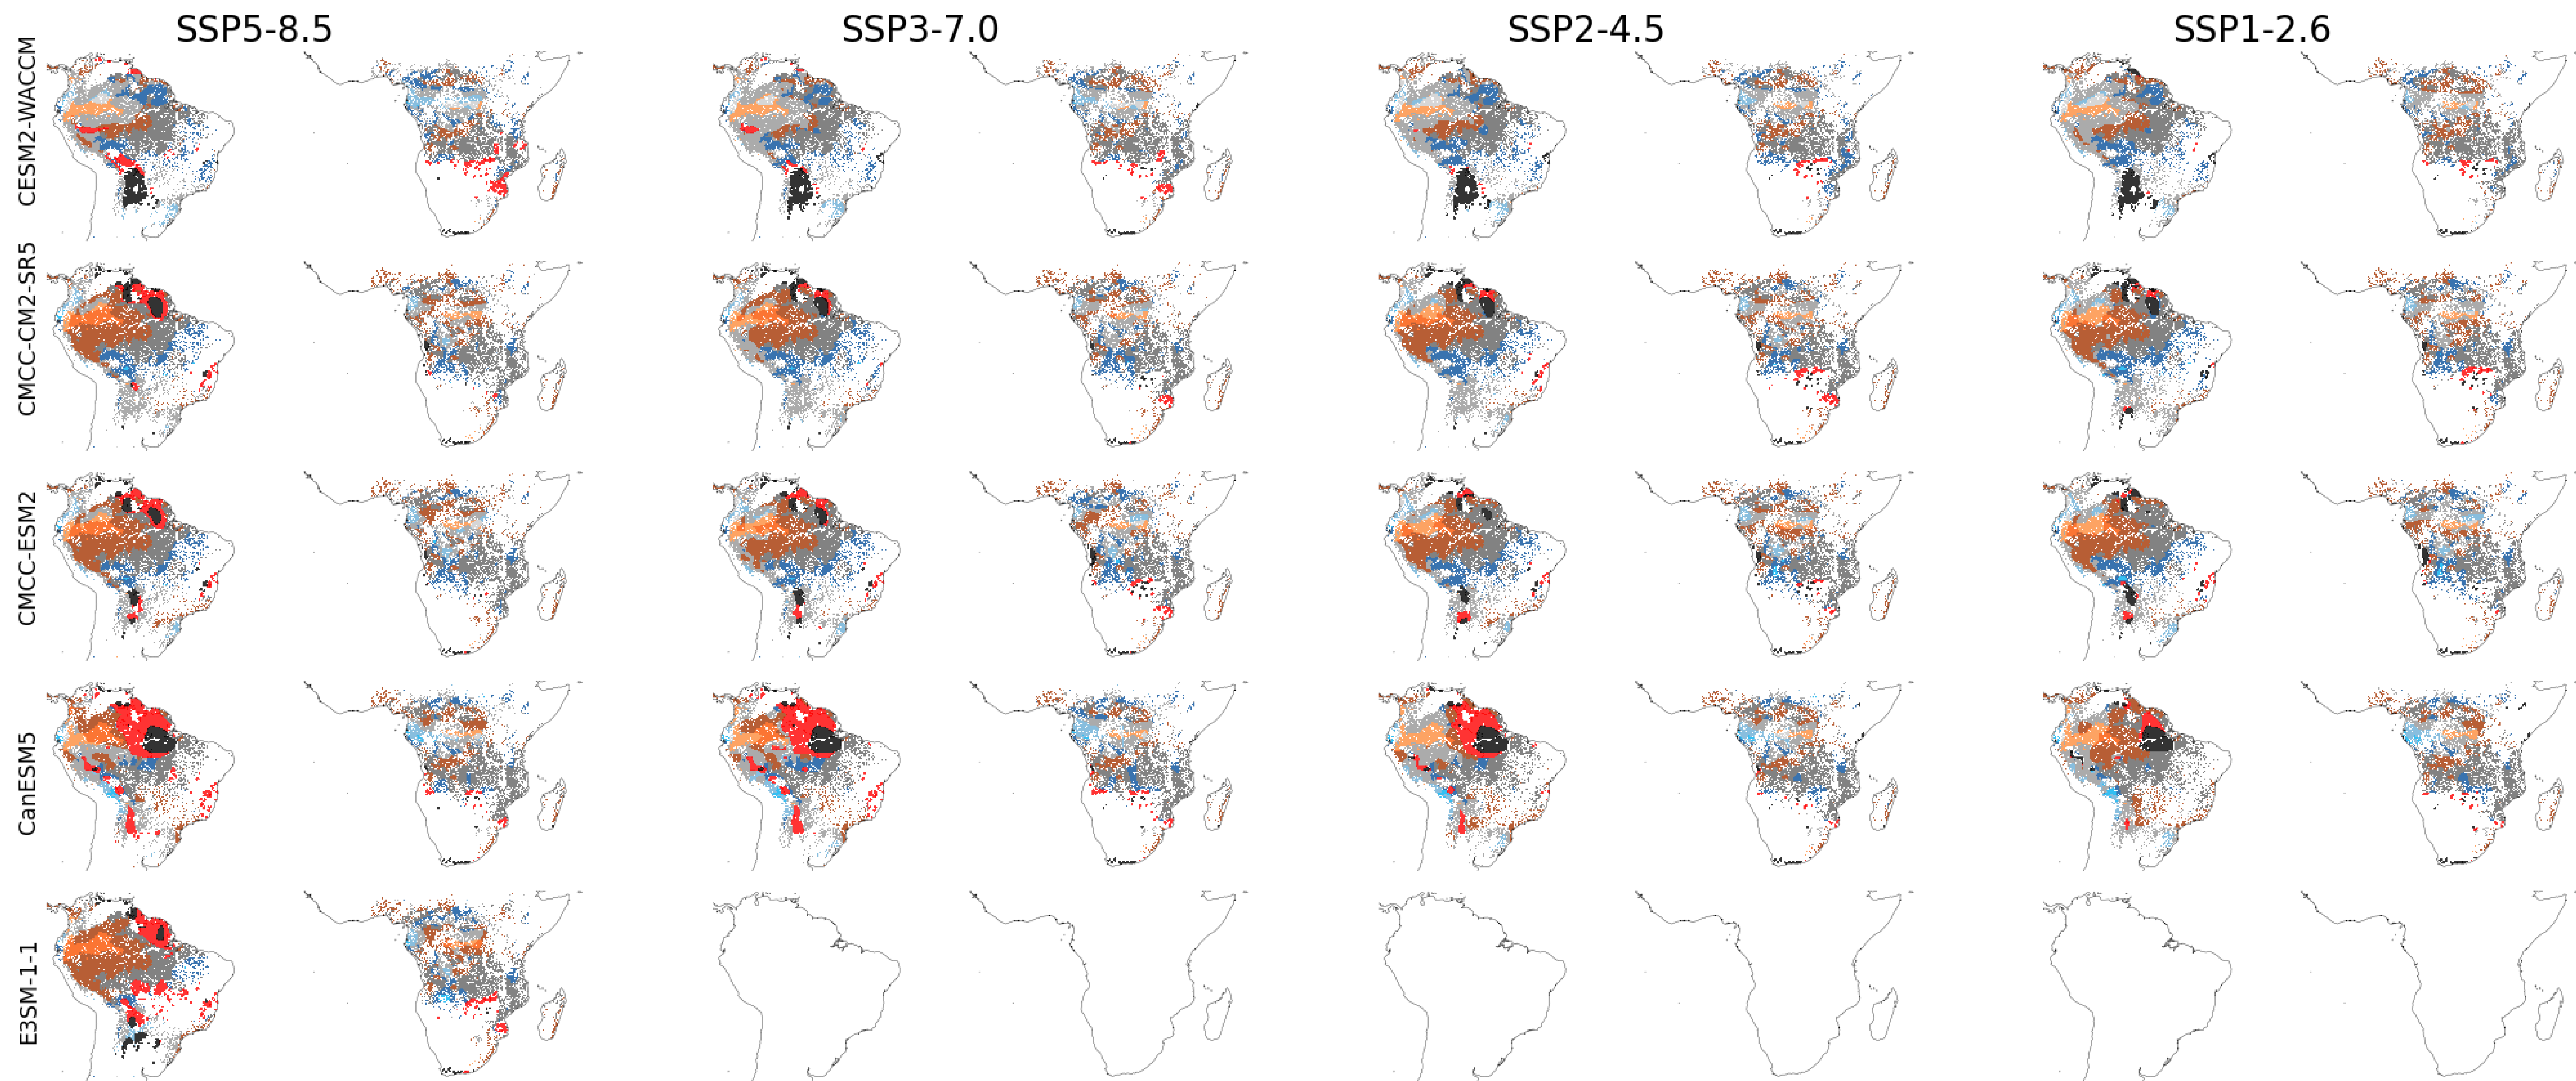

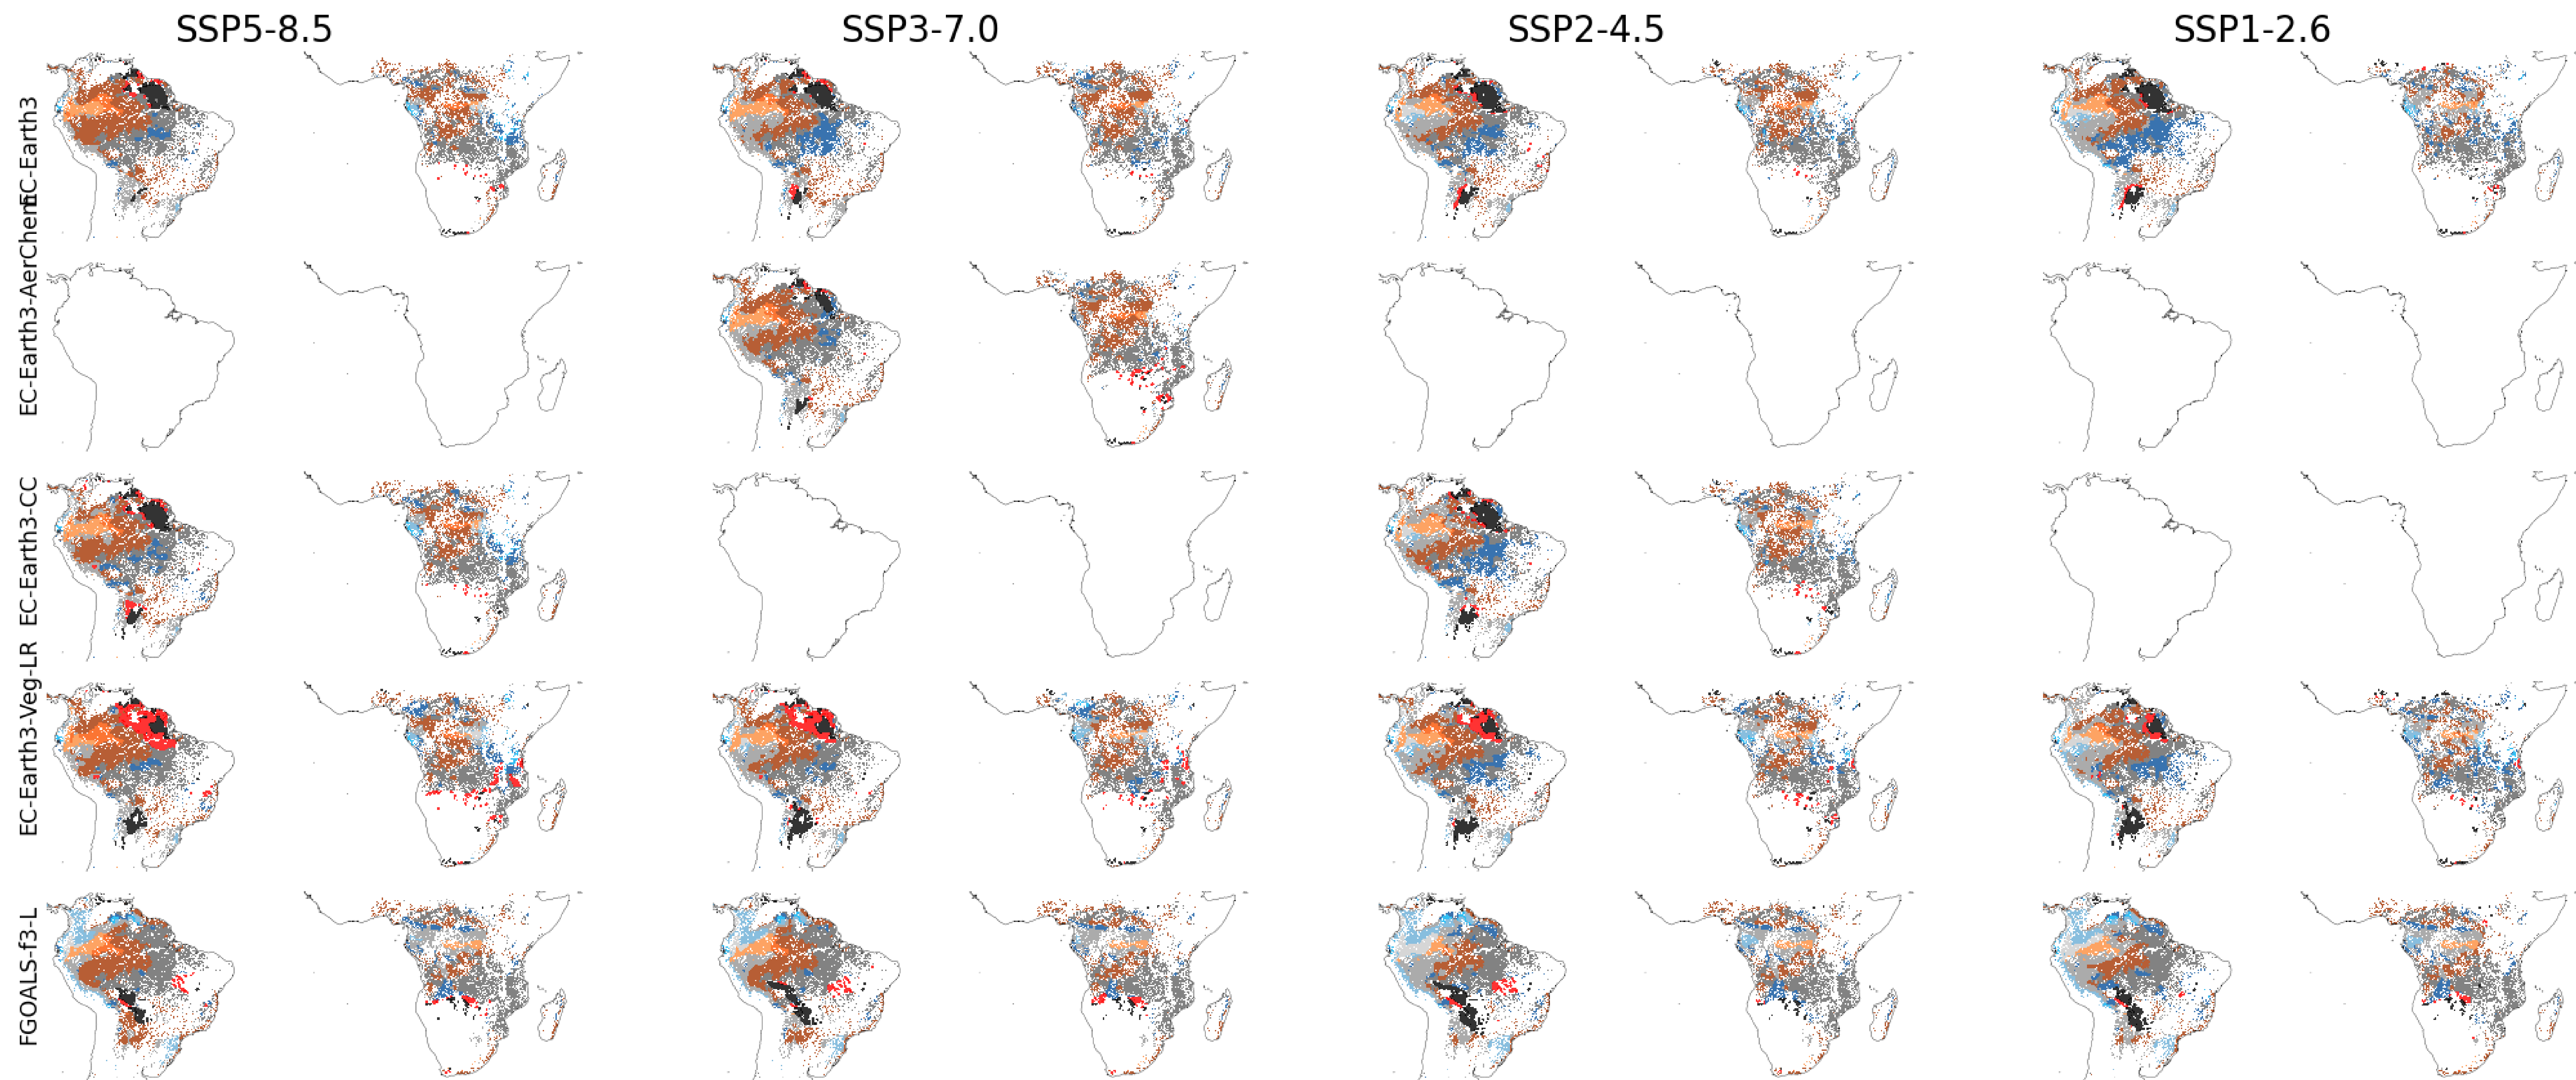

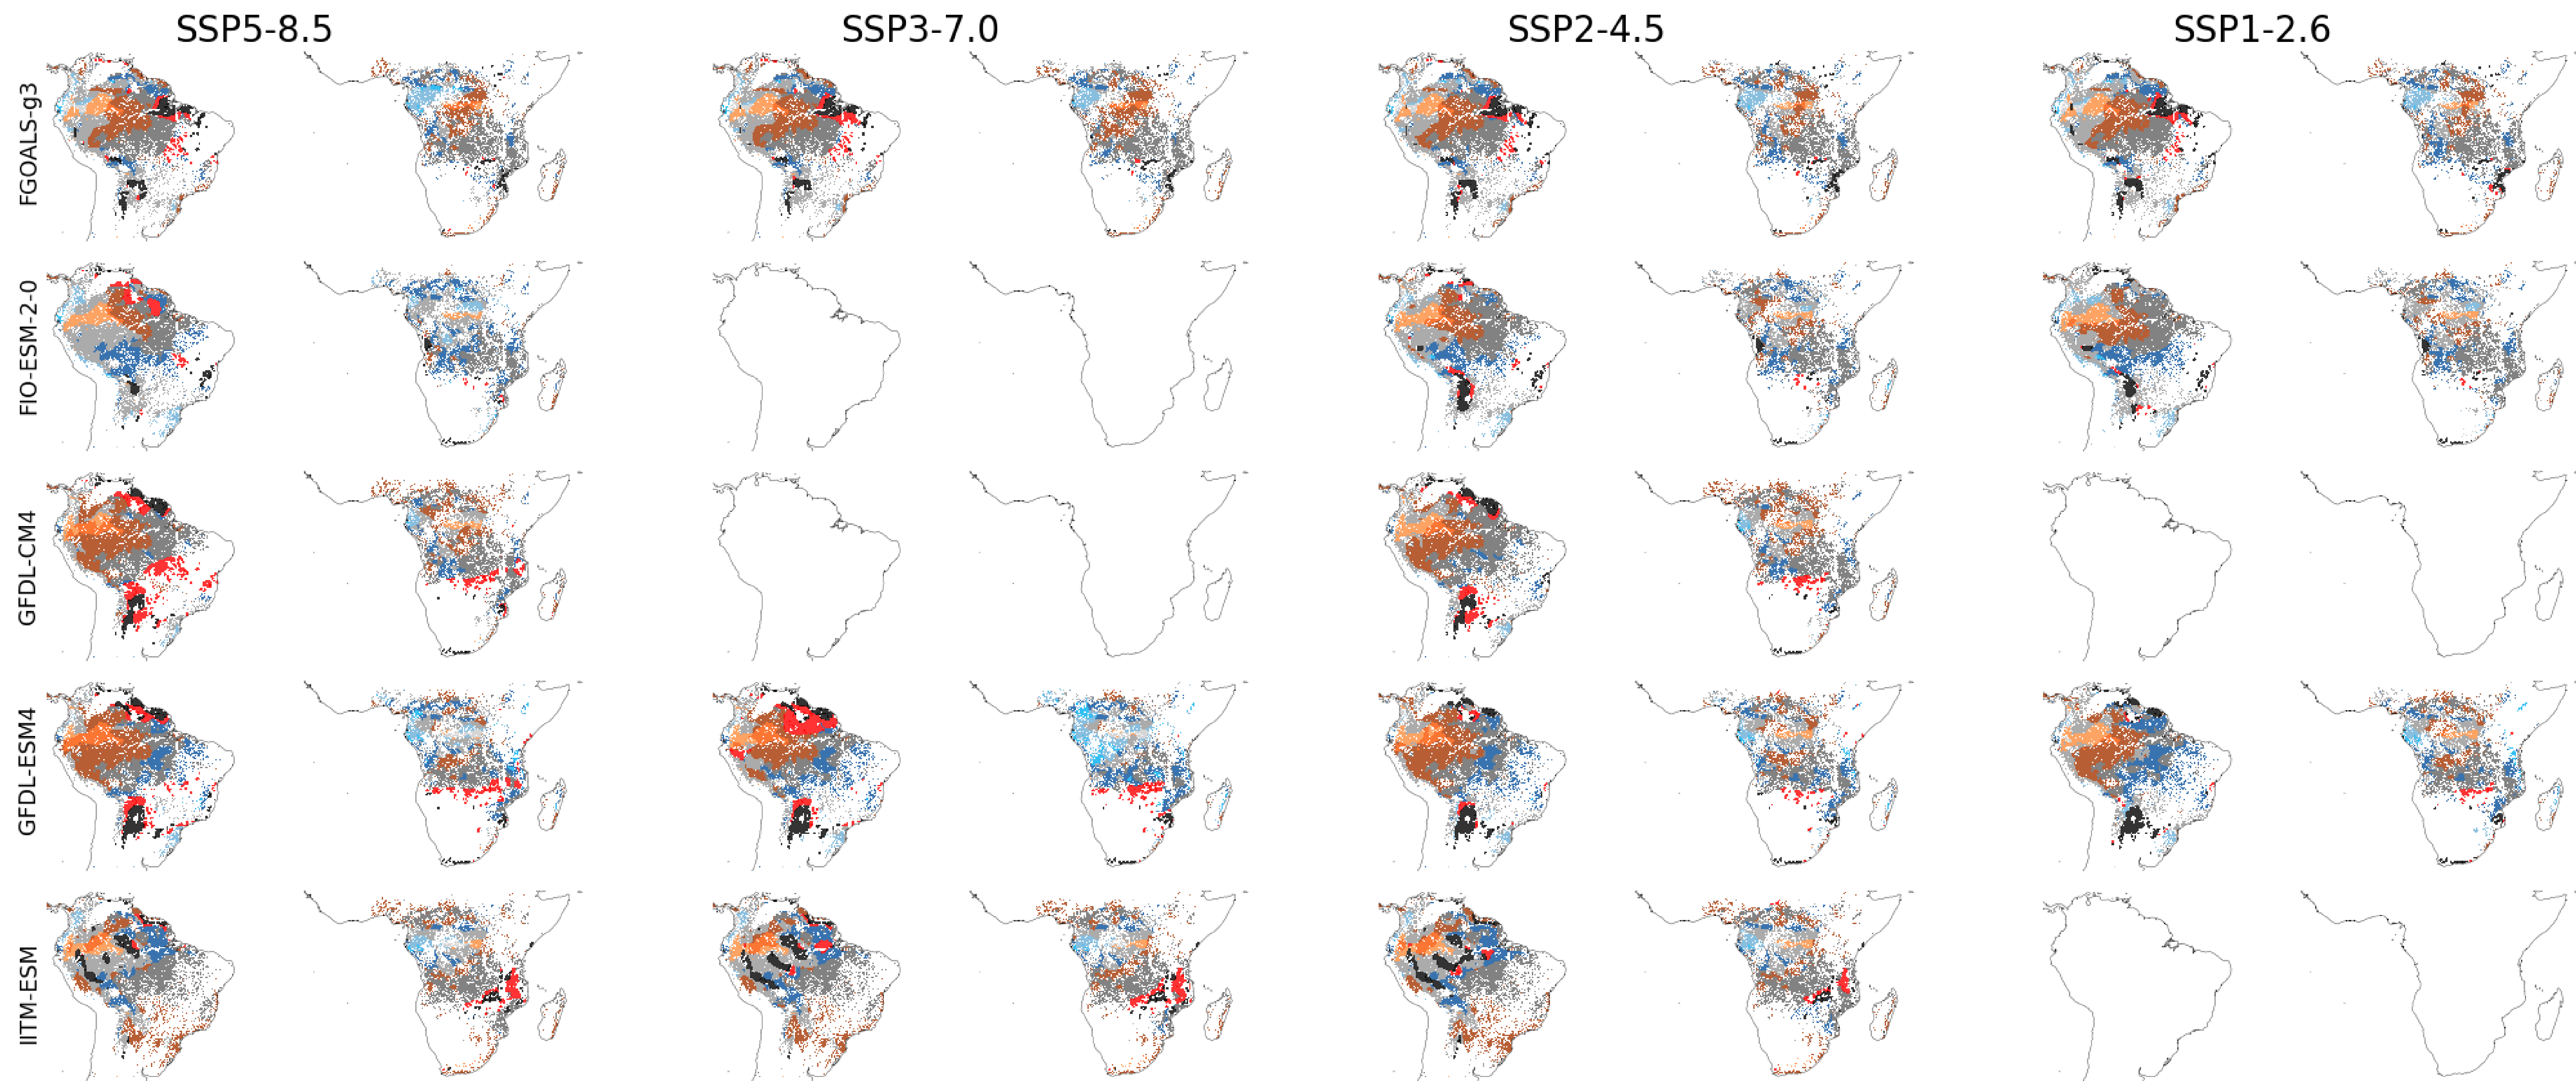

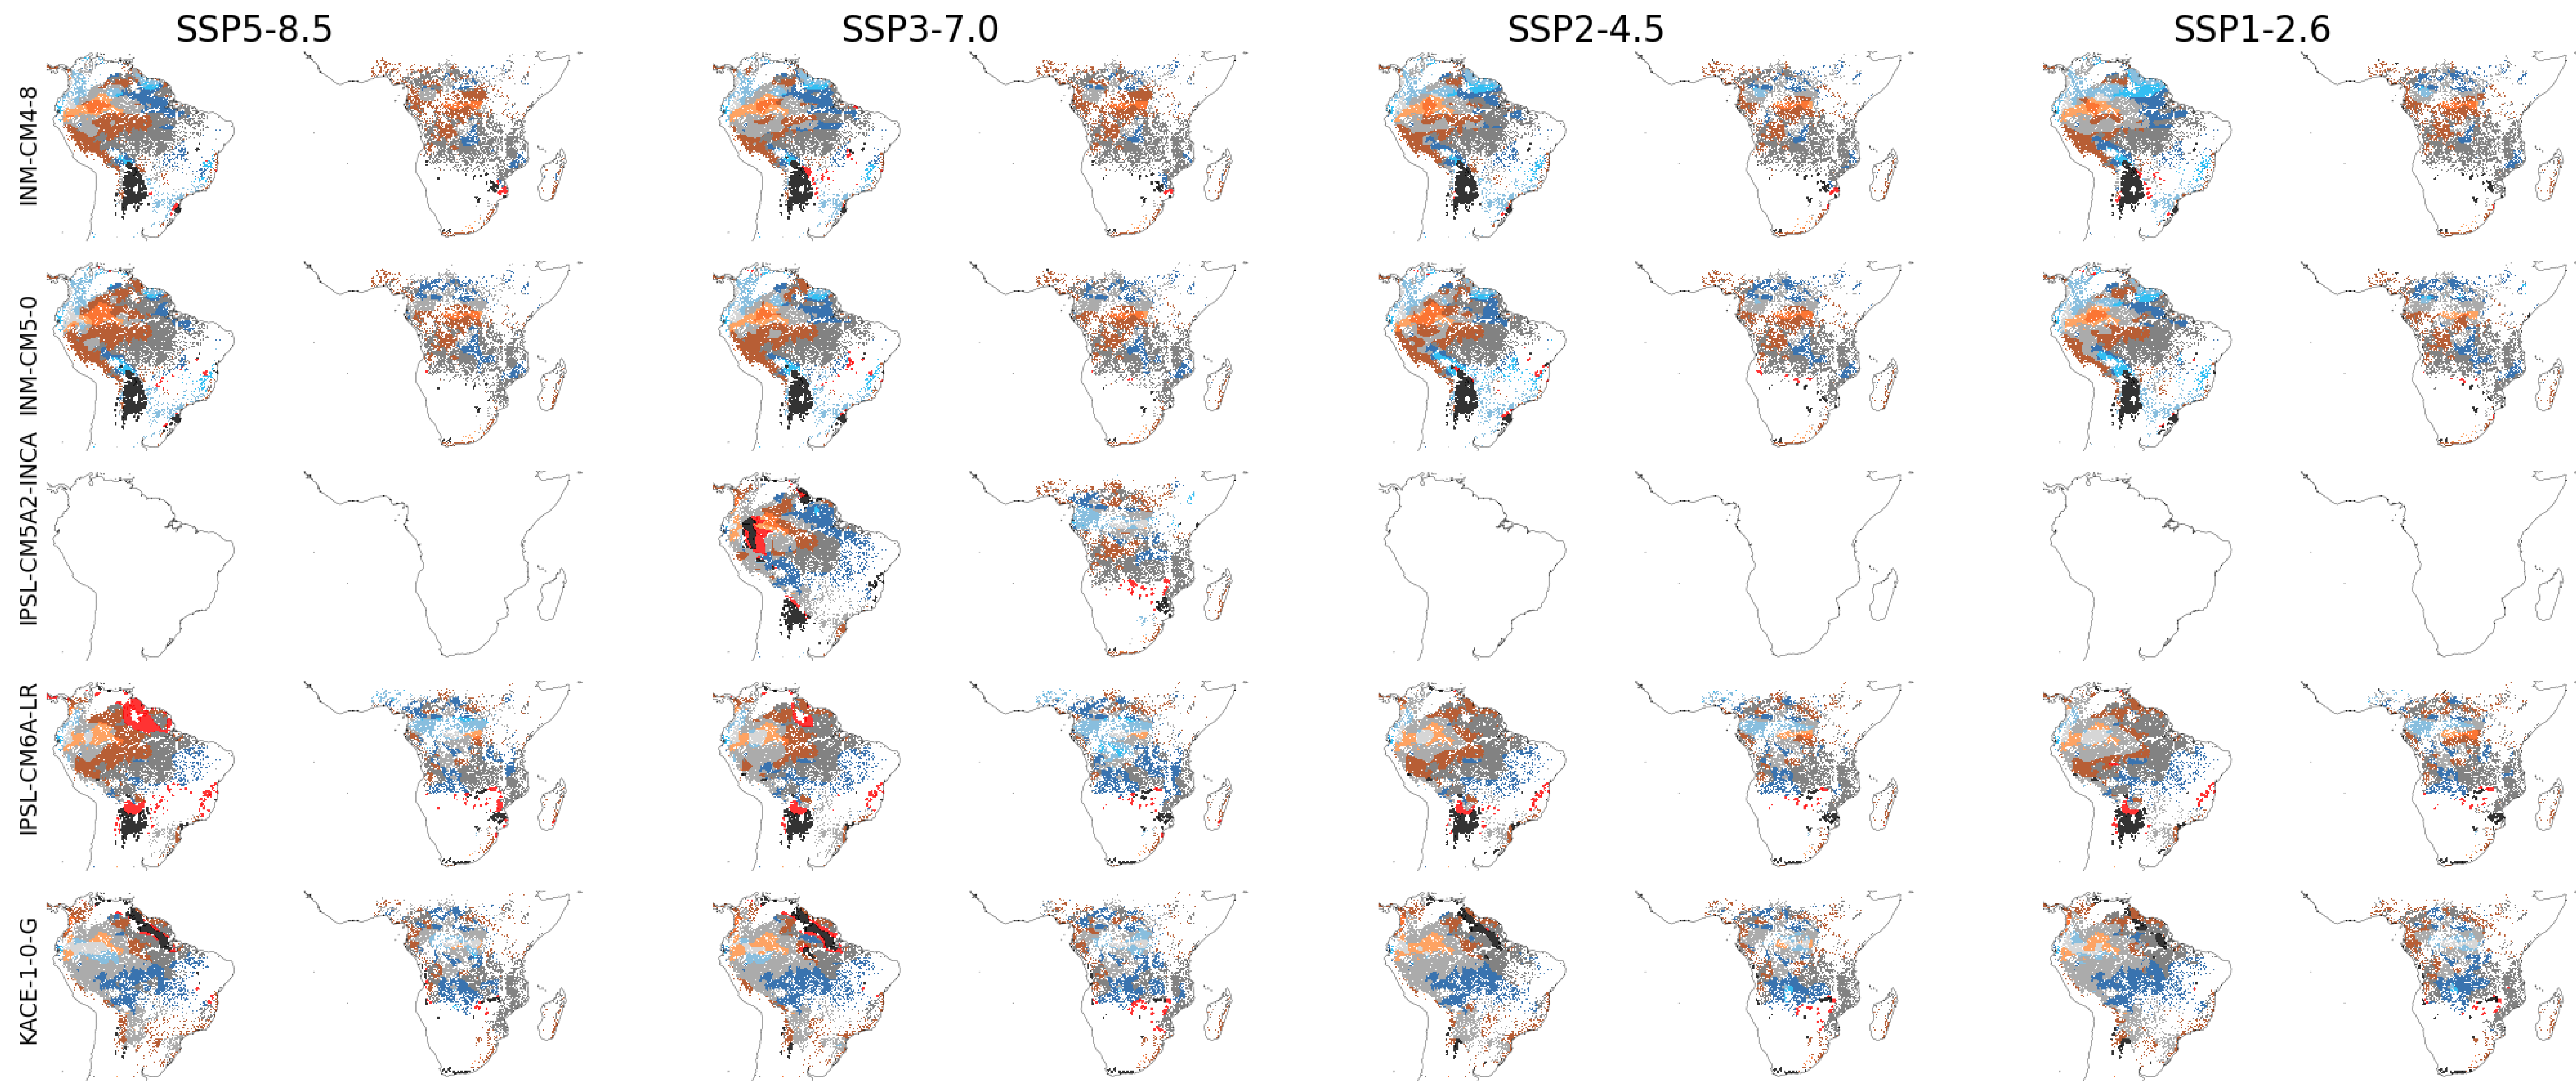



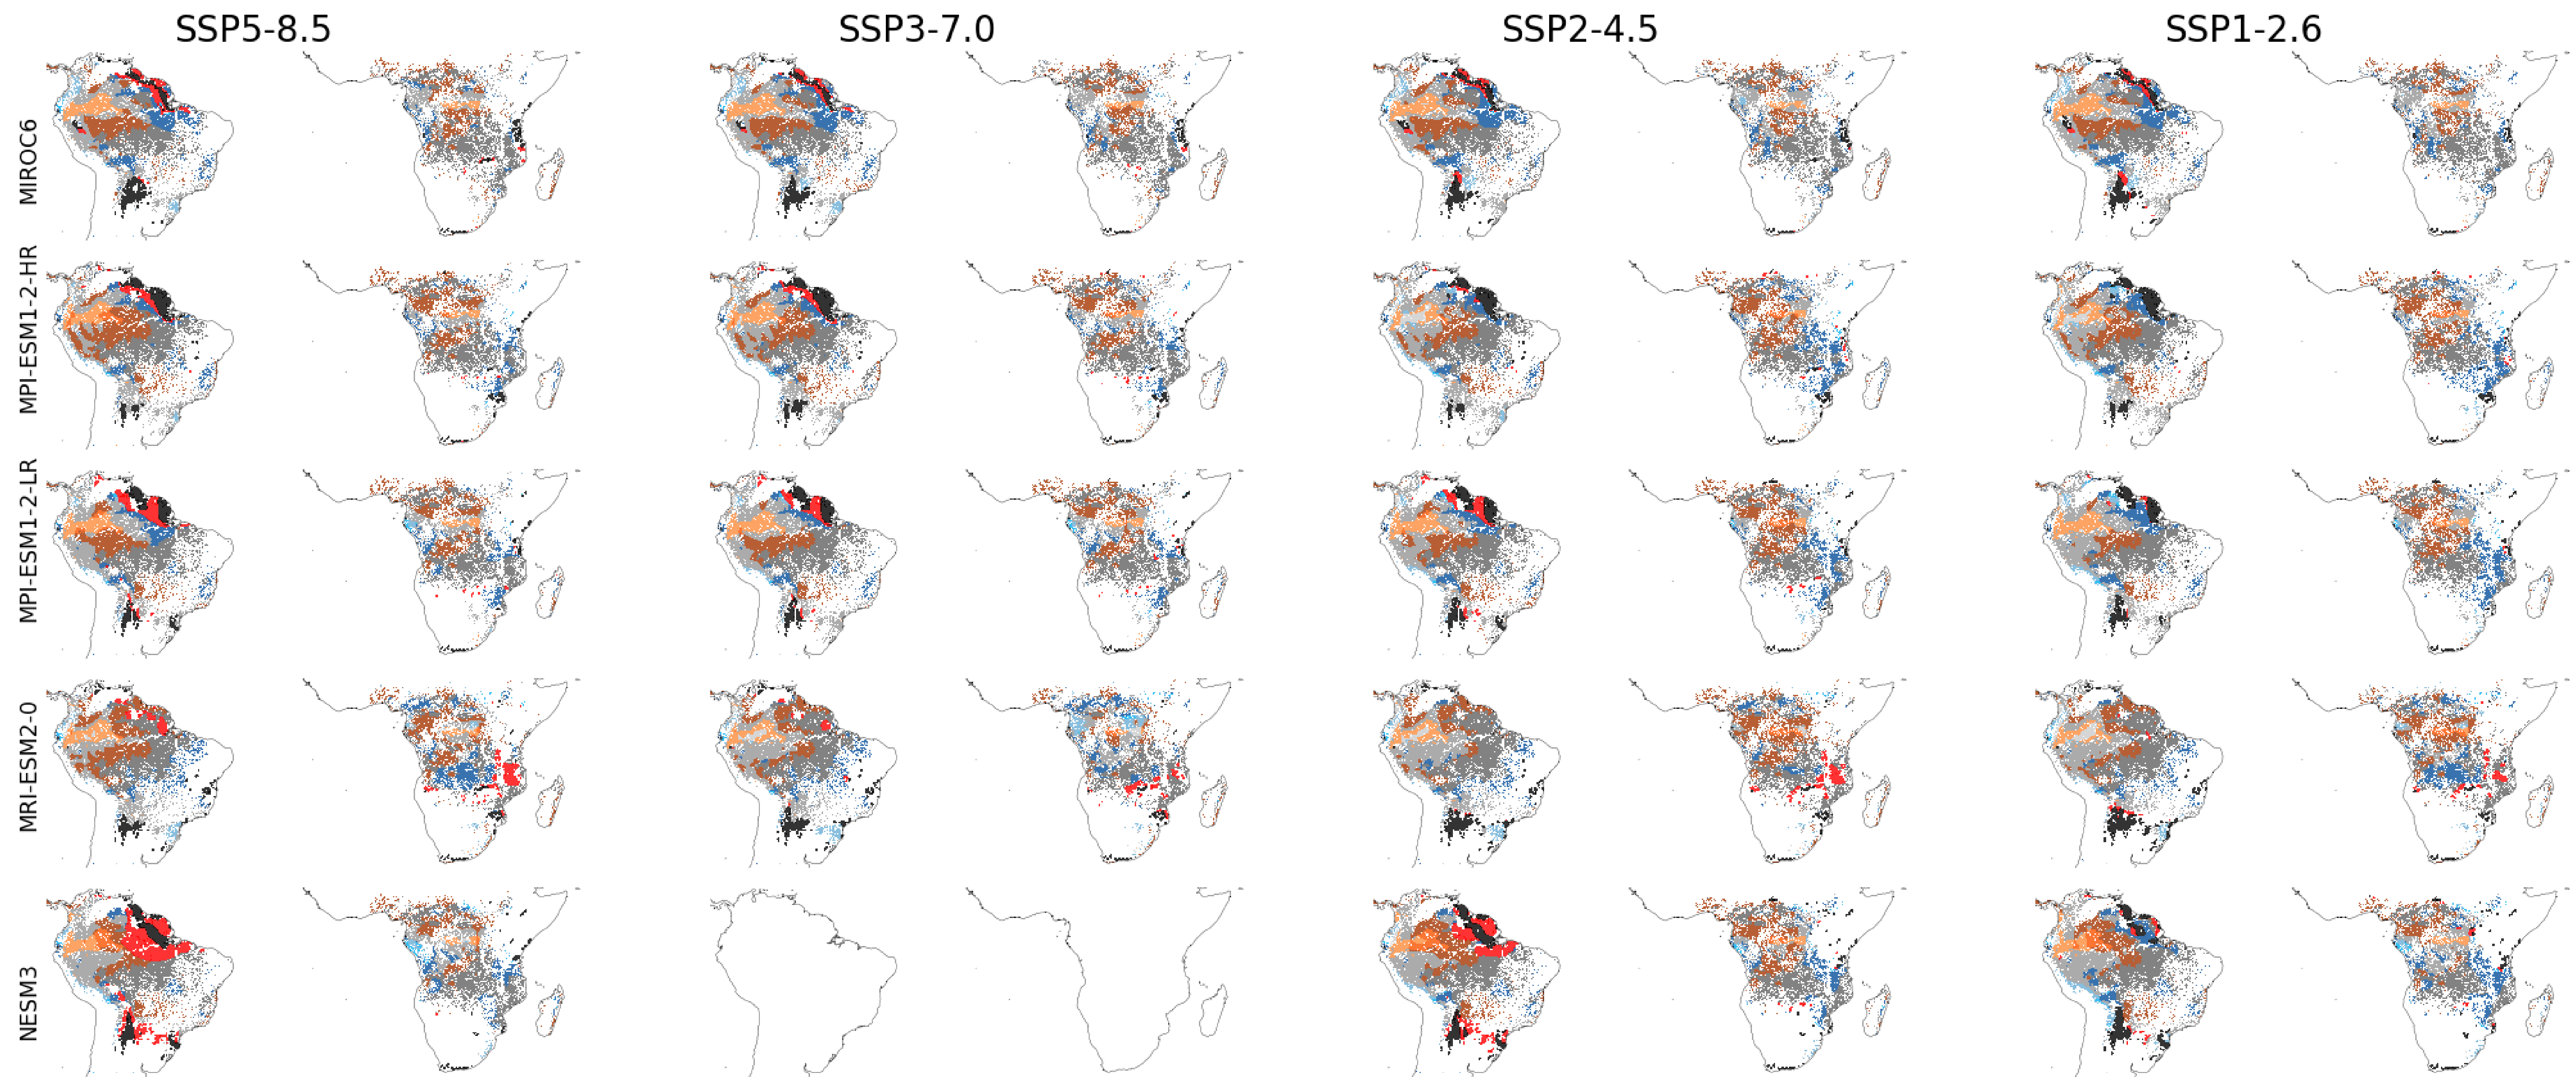

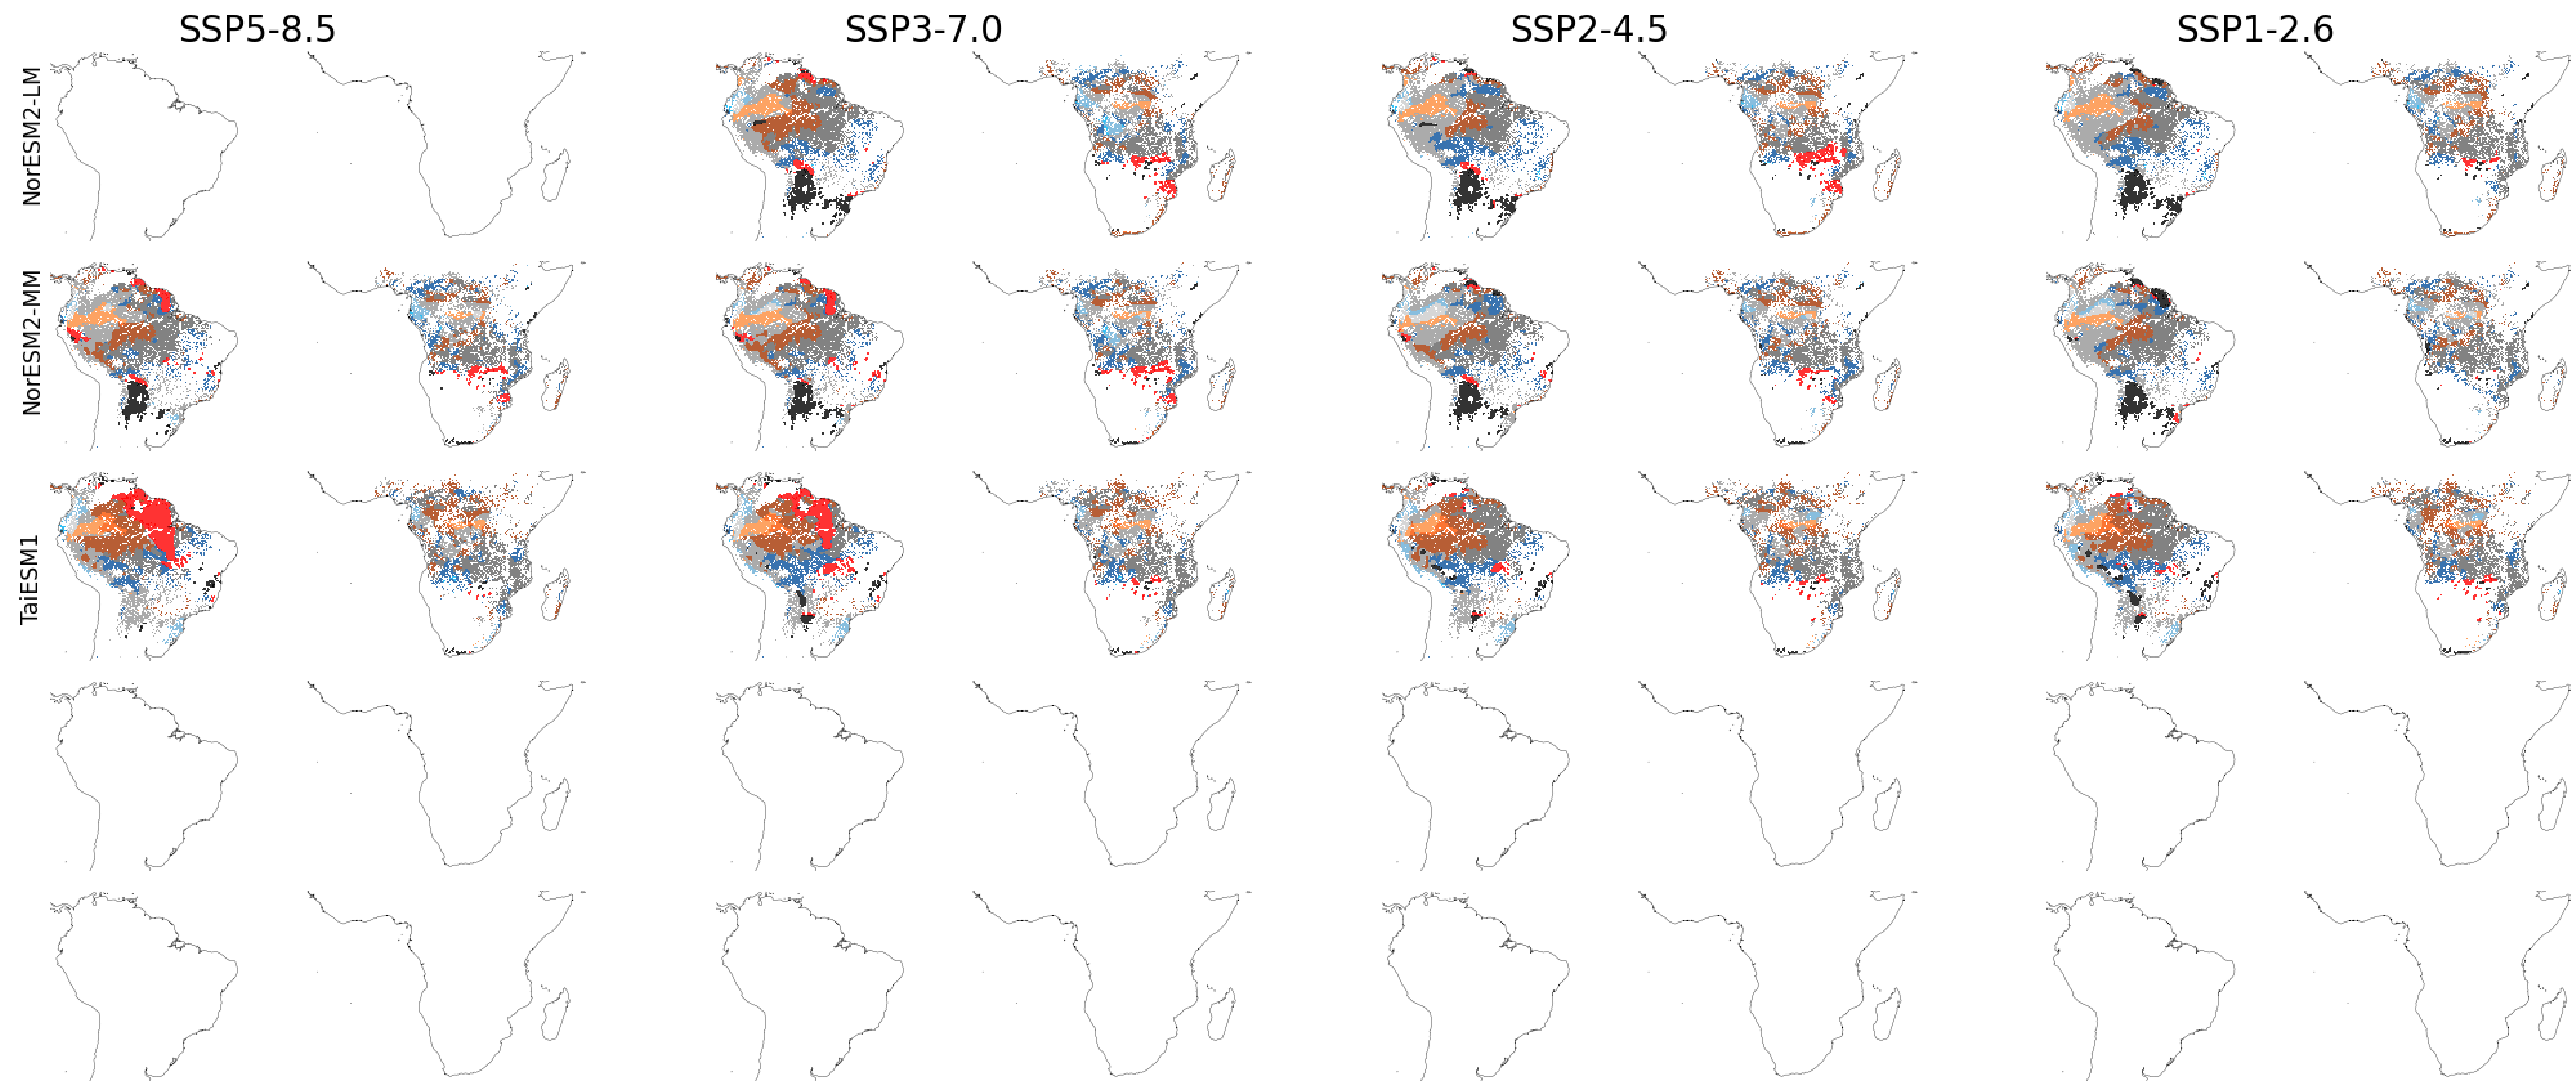

Supplement: Supplementary file 2 [file egusphere-2023-1486-supplement.zip]
