# Supplementary material for: Multi-fold increase in rainforests tipping risk beyond 1.5–2 °C warming
Source: Copernicus journal article supplement (doi:10.5194/egusphere-2023-1486), 2023-08-09
Supplement: Supplementary file 3 [file egusphere-2023-1486-supplement.zip]

Archive with 2 entries (2 files):
- 4. Supplementary Data.pdf
- 3. Supplementary Information.pdf
